# Supplementary material
Source: HighWire-hosted journal article supplement (http://www.ajnr.org/highwire/filestream/52374/field_highwire_adjunct_files/0/3508_materials.pdf)
Supplement: 3508_materials.pdf [file 3508_materials.pdf]

**On-line Table 1: Clinical, imaging, and follow-up data**

| Case | GA at FMR Imaging (week) | Sex | Genetic Risk Factor                                                                                                          | Karyotype   | Maternal Serum Ongoing TORCH Infection | Ultrasound-Based Indications for FMR Imaging                                                                     | Head Size Biometry at FMR Imaging (percentile) |
|------|--------------------------|-----|------------------------------------------------------------------------------------------------------------------------------|-------------|----------------------------------------|------------------------------------------------------------------------------------------------------------------|------------------------------------------------|
| 1    | 22                       | F   | None                                                                                                                         | NA          | None                                   | CC agenesis. Reduced cranial and cerebellar biometry                                                             | 10 <sup>th</sup>                               |
| 2    | 29                       | F   | Parents first-degree cousins. Previous pregnancy reported male fetus dead in utero with possible "Dandy-Walker malformation" | Normal 46XX | None                                   | Reduced body biometry, CC agenesis. Reduced cranial and cerebellar biometry                                      | < 3 <sup>rd</sup>                              |
| 3    | 23                       | M   | Previous son dead at 17 months with reported "microcephaly and corpus callosum agenesis"                                     | Normal 46XY | NA                                     | CC agenesis. Borderline bilateral ventriculomegaly                                                               | 10 <sup>th</sup>                               |
| 4    | 22                       | F   | None                                                                                                                         | Normal 46XX | None                                   | CC agenesis. Reduced cranial and cerebellar biometry. Borderline bilateral ventriculomegaly                      | 5 <sup>th</sup> -10 <sup>th</sup>              |
| 5    | 25                       | F   | None                                                                                                                         | NA          | None                                   | Reduced body biometry, CC agenesis. Reduced cranial and cerebellar biometry. Moderate bilateral ventriculomegaly | > 5 <sup>th</sup> -< 10 <sup>th</sup>          |

**On-line Table 1 (continued)**

| Case | Ganglionic Eminence Region Cavitations at FMR Imaging | Ganglionic Eminence Volume Increase | CC Agenesis or Severe Hypoplasia at FMR Imaging | Cortical Mantle Findings at FMR Imaging                                 | Cerebellar and Brain Stem Findings at FMR Imaging                                     | Clinical Follow-Up Data                                                                                                      | Follow-Up Neuromaging Data                                                                                                                                                             | Follow-Up Brain Pathology Data                                                                                                                                                |
|------|-------------------------------------------------------|-------------------------------------|-------------------------------------------------|-------------------------------------------------------------------------|---------------------------------------------------------------------------------------|------------------------------------------------------------------------------------------------------------------------------|----------------------------------------------------------------------------------------------------------------------------------------------------------------------------------------|-------------------------------------------------------------------------------------------------------------------------------------------------------------------------------|
| 1    | Small bilateral                                       | Mild doubtful increase              | Yes                                             | Cortical mantle thinning, reduced opercularization, no sulcation        | Apparently regular morphology, reduced biometry, cerebellar vermis partial hypoplasia | PT                                                                                                                           | NA                                                                                                                                                                                     | CC agenesis. Bilateral cavitation underneath GE, lined by epithelium-like structure. GE volume increased. Heterotopic cortical plate neurons extending into the marginal zone |
| 2    | Small bilateral                                       | Clear increase                      | Yes                                             | Reduced opercularization, probable band heterotopias, reduced sulcation | Apparently regular morphology, reduced biometry, cerebellar vermis present            | Eurotic delivery at 38 week GA. Severe hypotonia, poor feeding, no seizures. Dead from respiratory complications at 2 months | Neonatal MR imaging. CC agenesis. Reduced opercularization, band heterotopias (more conspicuous anteriorly), diffuse abnormal sulcation. Small bilateral cysts between GE and thalamus | NA                                                                                                                                                                            |
| 3    | Large bilateral                                       | Mild doubtful increase              | Yes                                             | Cortical mantle thinning, reduced opercularization, no sulcation        | Apparently regular morphology, reduced biometry, cerebellar vermis present            | PT                                                                                                                           | MR autopsy. CC agenesis, parieto-occipital sulcus absent; bilateral symmetric cavitations underneath GE with regular margins                                                           | NA                                                                                                                                                                            |
| 4    | Large bilateral                                       | Clear increase                      | Yes                                             | Cortical mantle thinning, reduced opercularization                      | Apparently regular morphology, reduced biometry, cerebellar vermis present            | PT                                                                                                                           | NA                                                                                                                                                                                     | CC agenesis. Bilateral cavitation underneath GE, lined by epithelium-like structure. GE volume increased. Heterotopic cortical plate neurons extending into the marginal zone |
| 5    | Small bilateral                                       | No increase                         | Yes                                             | Cortical mantle thinning, reduced opercularization, no sulcation        | Apparently regular morphology, reduced biometry, cerebellar vermis present            | PT                                                                                                                           | NA                                                                                                                                                                                     | NA                                                                                                                                                                            |

**Note:**—FMR indicates fetal MR; NA, not available; PT, pregnancy termination; TORCH, toxoplasmosis, others, rubella, cytomegalovirus, herpes.

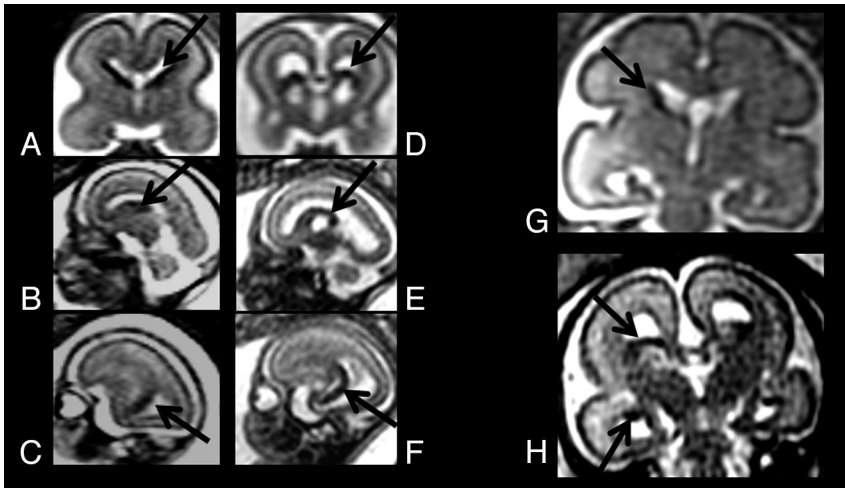

**ON-LINE FIG 1.** A–C, Single-shot FSE T2-weighted sections from healthy control 22-week GA fetus; D–F, matching sections from case 4 prenatal study show GE (arrows) to be larger than the one of control; G, ss-FSE T2-weighted coronal section from healthy control 29-week GA fetus; H, matching section from case 2 prenatal study shows GE (arrows) to be larger than that of control.

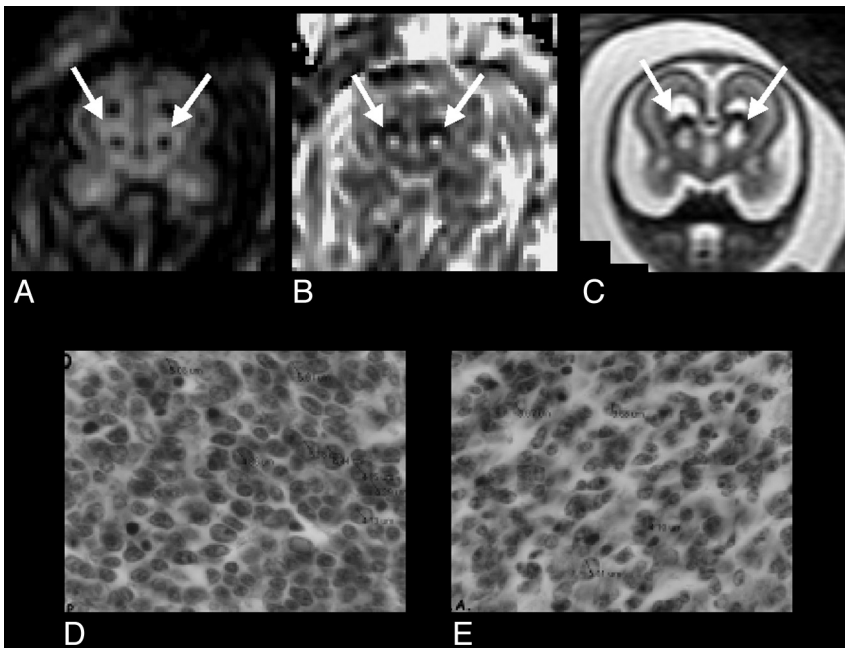

**ON-LINE FIG 2.** Case 4 of On-line Table 1: A, coronal DWI section; B, corresponding ADC map; and C, matching T2-weighted single-shot FSE section shows relatively DWI-hyperintense signal and slightly low ADC (0.85 SD, 0.09  $\mu\text{m}^2/\text{s}$ ) in the GE (arrows). D, Thionine-stained section ( $\times 100$  magnification) depicts higher GE cell attenuation with smaller interstitial space with respect to age-matched (22-week GA) healthy fetus (E). Cell bodies appear to be generally slightly larger than those of healthy control.
